# Supplementary material for: Effects of a Combined High-Intensity Interval Training and Resistance Training Program in Patients Awaiting Bariatric Surgery: A Pilot Study
Source: Sports (Basel). 2019 Mar 25;7(3):72. doi: 10.3390/sports7030072 (PMC6473567; doi:10.3390/sports7030072)
Supplement: Supplementary file 1 [file sports-07-00072-s001.pdf]

# SUPPLEMENTARY MATERIAL

**Appendix I.** Changes (%) in all the variables evaluated. Qualitative inference and likelihood (%) of the effects being positive/trivial/negative for each of the groups.

| Variables                                                                  | % Change<br>(90% CL) | EG (n=3)                                       |         |            |                            | % Change<br>(90% CL) | CG (n=3)                                       |         |            |                            |
|----------------------------------------------------------------------------|----------------------|------------------------------------------------|---------|------------|----------------------------|----------------------|------------------------------------------------|---------|------------|----------------------------|
|                                                                            |                      | Chances that the true effects were substantial |         |            |                            |                      | Chances that the true effects were substantial |         |            |                            |
|                                                                            |                      | Harmful                                        | Trivial | Beneficial | Qualitative inference      |                      | Harmful                                        | Trivial | Beneficial | Qualitative inference      |
| <b>BMI (kg·m<sup>-2</sup>)</b>                                             | 9.0 (3.0;14.6)       | 2                                              | 1       | 97         | Unclear                    | -0.5 (-3.0;1.9)      | 48                                             | 36      | 16         | <b>Possibly harmful</b>    |
| Weight (kg)                                                                | 9.0 (3.0;14.6)       | 1                                              | 4       | 95         | Unclear                    | -0.5 (-3.0;1.9)      | 4                                              | 94      | 2          | Likely trivial             |
| EBW (kg)                                                                   | 26.9 (8.7;41.5)      | 2                                              | 1       | 97         | Unclear                    | -1.4 (-8.2;4.9)      | 36                                             | 52      | 12         | Possibly harmful           |
| <b>EBW (%)</b>                                                             | 19.7 (5.7;31.7)      | 3                                              | 0       | 97         | Unclear                    | -0.9 (-5.1;3.1)      | 48                                             | 37      | 15         | <b>Possibly harmful</b>    |
| Fat mass (kg)                                                              | 17.5 (-7.4;36.6)     | 6                                              | 7       | 87         | Unclear                    | 0.7 (-1.9;3.3)       | 1                                              | 96      | 2          | Very likely trivial        |
| <b>Fat mass (%)</b>                                                        | 9.3 (-11.0;25.9)     | 12                                             | 7       | 82         | <b>Unclear</b>             | 1.2 (0.6;1.9)        | 0                                              | 93      | 7          | Likely trivial             |
| FFM (Kg)                                                                   | -3.7 (-8.1;0.9)      | 76                                             | 21      | 3          | Unclear                    | 1.7 (-0.5;4.0)       | 2                                              | 76      | 22         | Likely trivial             |
| <b>FFM (%)</b>                                                             | 5.8 (-4.0;16.6)      | 8                                              | 10      | 82         | <b>Likely beneficial</b>   | 1.2 (0.7;1.7)        | 0                                              | 96      | 4          | Very likely trivial        |
| Waist (cm)                                                                 | 5.0 (5.0;13.6)       | 7                                              | 20      | 73         | Unclear                    | -0.4 (-3.0;2.2)      | 6                                              | 91      | 4          | Likely trivial             |
| Hip (cm)                                                                   | 6.5 (1.1;11.6)       | 2                                              | 4       | 93         | Unclear                    | 0.3 (-1.4;1.9)       | 3                                              | 92      | 5          | Likely trivial             |
| WHR (cm)                                                                   | -1.6 (-9.2;5.5)      | 29                                             | 62      | 10         | <b>Possibly harmful</b>    | -0.7 (-1.7;0.3)      | 1                                              | 99      | 0          | Very likely trivial        |
| <b>Visceral fat (%)</b>                                                    | 15.9 (-6.8;33.8)     | 5                                              | 9       | 86         | <b>Unclear</b>             | 2.3 (-4.5;8.6)       | 4                                              | 82      | 14         | Likely trivial             |
| SBP (mmHg)                                                                 | 144.22±37.39         | 27                                             | 14      | 59         | Unclear                    | -0.8 (-14.8;11.6)    | 45                                             | 20      | 34         | Unclear                    |
| DBP (mmHg)                                                                 | 83.22±18.68          | 10                                             | 21      | 68         | Unclear                    | 4.6 (-15.0;20.9)     | 19                                             | 17      | 63         | Unclear                    |
| HR <sub>rest</sub> (bpm)                                                   | 56.33±12.34          | 68                                             | 29      | 2          | <b>Possibly harmful</b>    | -1.7 (-13.3;8.7)     | 12                                             | 82      | 6          | Likely trivial             |
| VO <sub>2peak abs</sub> (L·min <sup>-1</sup> )                             | 2.62±1.11            | 20                                             | 77      | 3          | Likely trivial             | 6.1 (-21.3;43.0)     | 19                                             | 30      | 51         | <b>Possibly beneficial</b> |
| VO <sub>2peak abs</sub> /FFM<br>(mL*FFM <sup>-1</sup> ·min <sup>-1</sup> ) | 39.92±8.01           | 5                                              | 18      | 76         | <b>Likely beneficial</b>   | 4.4 (-21.1;38.0)     | 25                                             | 23      | 52         | <b>Possibly beneficial</b> |
| MDS <sub>D-Q</sub> (N·m)                                                   | 151.84±36.10         | 19                                             | 70      | 11         | Possibly trivial           | 4.0 (-4.3;13.0)      | 4                                              | 64      | 32         | <b>Possibly beneficial</b> |
| MDS <sub>D-H</sub> (N·m)                                                   | 86.53±24.87          | 21                                             | 63      | 16         | Possibly trivial           | -8.6 (-19.7;4.0)     | 36                                             | 62      | 2          | Unclear                    |
| MDS <sub>ND-Q</sub> (N·m)                                                  | 149.88±47.94         | 1                                              | 8       | 91         | <b>Likely beneficial</b>   | 0.4 (-8.5;10.3)      | 15                                             | 66      | 19         | Possibly trivial           |
| MDS <sub>ND-H</sub> (N·m)                                                  | 75.81±14.93          | 5                                              | 10      | 85         | <b>Likely beneficial</b>   | 6.7 (1.3;12.3)       | 1                                              | 14      | 84         | <b>Likely beneficial</b>   |
| MIS <sub>D-Q</sub> (N·m)                                                   | 141.90±19.18         | 12                                             | 85      | 4          | Likely trivial             | -5.6 (-22.1;14.2)    | 55                                             | 33      | 12         | Unclear                    |
| MIS <sub>D-H</sub> (N·m)                                                   | 95.83±23.39          | 35                                             | 52      | 12         | Unclear                    | -13.5 (-37.2;19.2)   | 70                                             | 21      | 9          | Unclear                    |
| <b>MIS<sub>ND-Q</sub> (N·m)</b>                                            | 147.50±3.47          | 13                                             | 53      | 34         | <b>Possibly beneficial</b> | -9.0 (-19.1;2.3)     | 82                                             | 14      | 4          | Unclear                    |
| MIS <sub>ND-H</sub> (N·m)                                                  | 90.30±15.95          | 11                                             | 81      | 8          | Likely trivial             | -1.4 (-31.3;21.7)    | 20                                             | 64      | 16         | Possibly trivial           |

PAP = Physical Activity Program; EG = experimental group; CL = coefficient limits; BMI = body mass index; EBW = excess body weight; FFM = fat free mass; WHR = waist-to-hip ratio; SBP = systolic blood pressure; DBP = diastolic blood pressure; HR<sub>rest</sub> = heart rate at rest; VO<sub>2peak abs</sub> = absolute peak oxygen uptake; VO<sub>2peak abs</sub>/FFM = absolute peak oxygen uptake normalized to FFM; MDS = maximal dynamic strength; D = dominant; ND = non-dominant; Q = quadriceps; H = hamstrings; MIS = maximal isokinetic strength.
